# Supplementary material for: Nanohydroxyapatite/Titanate Nanotube Composites for Bone Tissue Regeneration
Source: MDPI journal article supplement (doi:10.3390/jfb13040306), 2022-12-17
Supplement: s1 [file s1]

## Supplementary Information

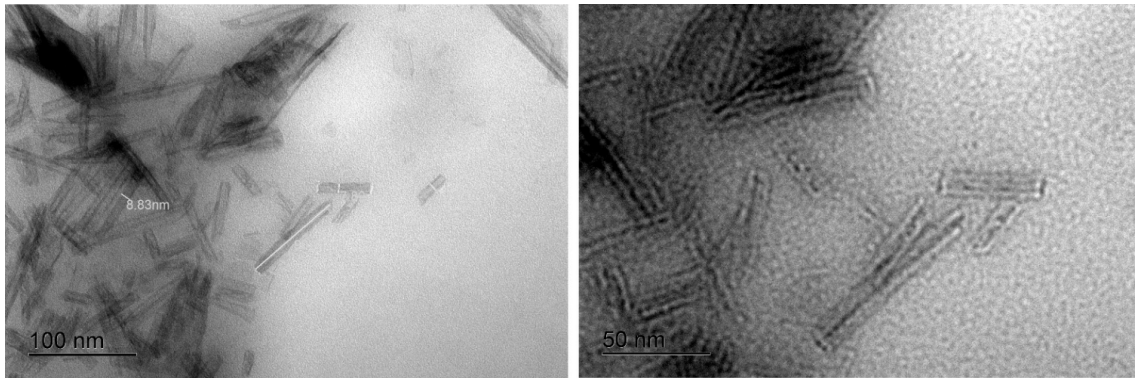

Figure S1. Transmission electron microscopy images showing the nanometric diameter (~10nm) of titanate nanotubes.

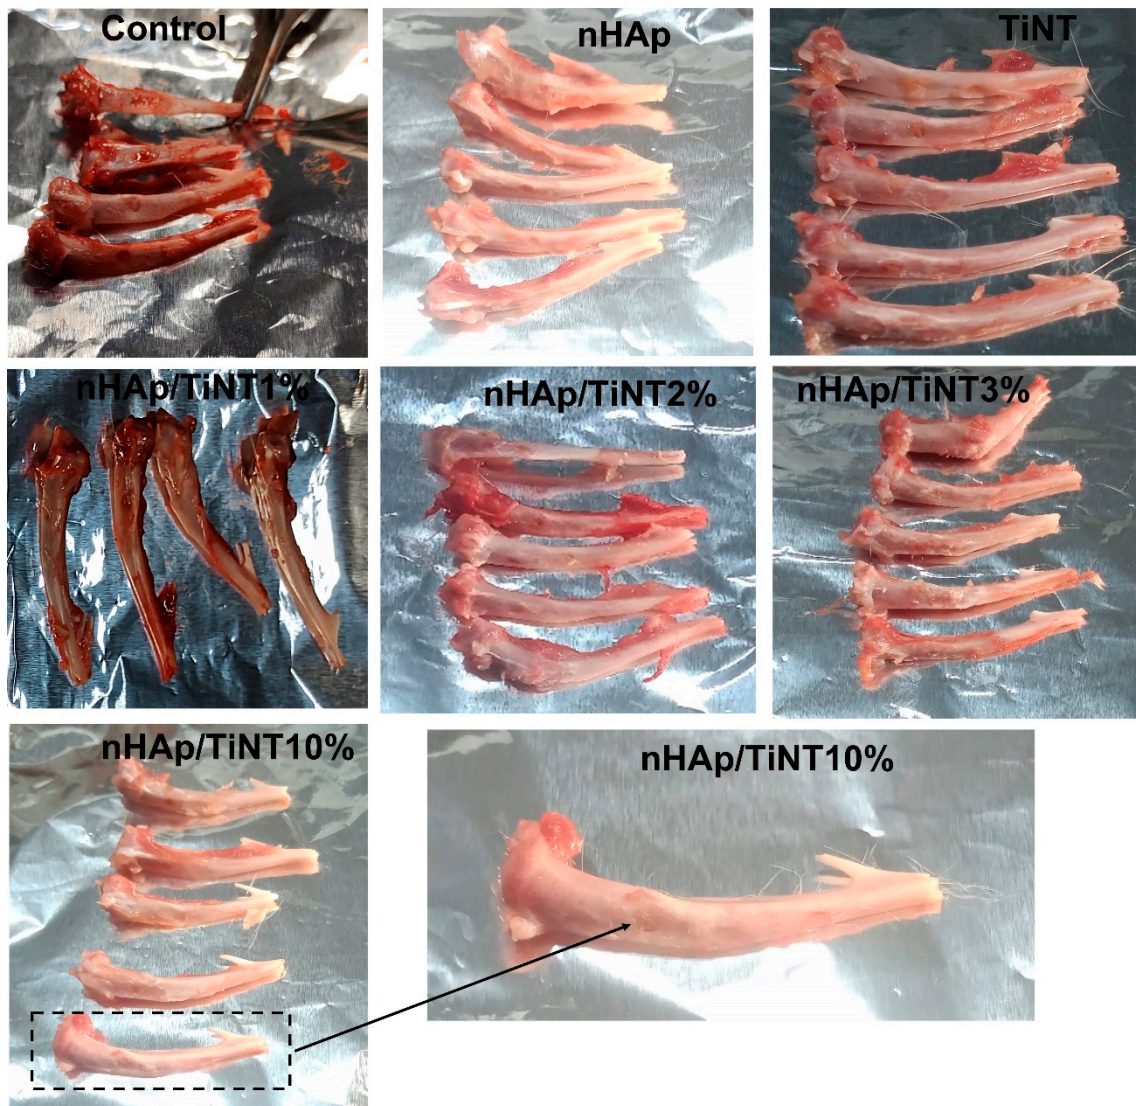

Figure S2: Images of the tibias of the experimental groups after 30 days of implantation of the nanobiomaterials: nHAp, nHAp/TiNT1%, nHAp/TiNT2%, nHAp/TiNT3% e nHAp/TiNT10%.
